# Supplementary material
Source: PubMed Central journal article supplement (PMC4495203)
Supplement: AEM.01160-15_zam999116423so1.pdf [file AEM.01160-15_zam999116423so1.pdf]

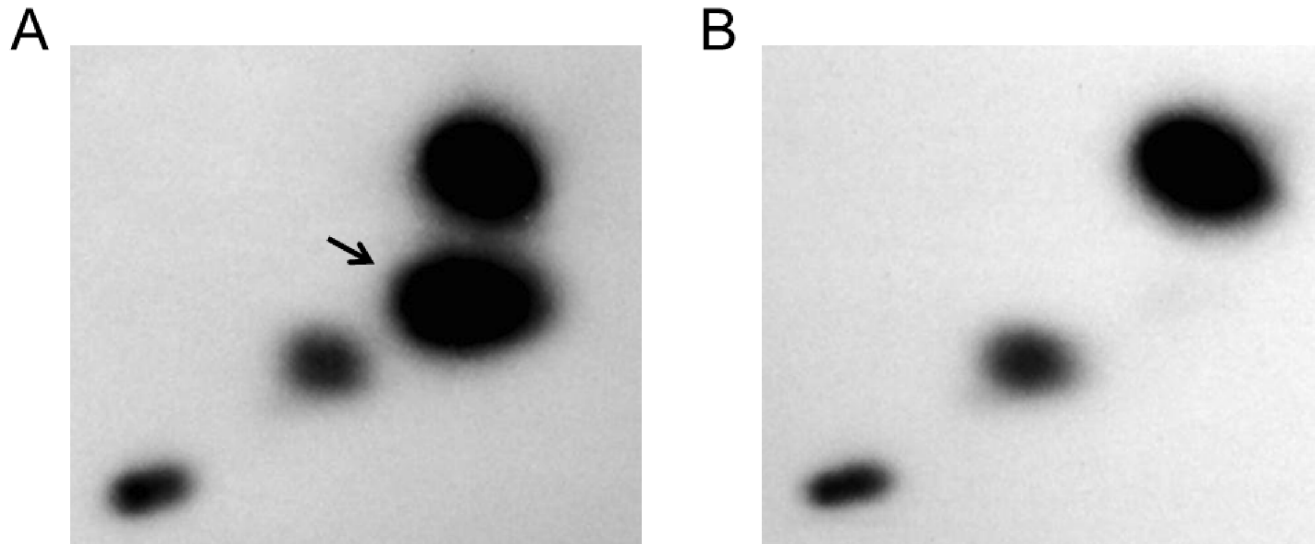

**Figure S1.** Identification of acetyl-phosphate (AcP) by 2D-TLC. An acid extract of *S. mutans* UA159 was prepared as described in the Methods section. Standard acetyl- $[^{32}\text{P}]$ phosphate was synthesized as following: 4.6  $\mu\text{l}$  of acetic anhydride was slowly added in mixture of 32 % [v/v] pyridine, 170 mM  $\text{K}_2\text{HPO}_4$ , and 70  $\mu\text{Ci}$   $[^{32}\text{P}]$ -orthophosphate, and the mixture was incubated on ice for 2 min. After incubation, 18  $\mu\text{l}$  of 4 M LiOH was added and incubated on ice for 3 min. The synthetic AcP was precipitated by adding 958  $\mu\text{l}$  of ice-cold ethanol. The precipitated AcP was washed twice with 1 ml of ice-cold ethanol by centrifugation and resuspended in 125  $\mu\text{l}$  distilled water. For further purification, 60  $\mu\text{l}$  of ice-cold ethanol was added in the resuspendant, incubated on ice for 15 min, and collected by centrifugation. The purified labeled AcP was dried under vacuum and resuspended in 34  $\mu\text{l}$  of 100 mM Tris-HCl, pH 7.0. The location of AcP was determined by 2D-TLC of either acid extract of *S. mutans* and synthetic acetyl- $[^{32}\text{P}]$ phosphate mixture (A) or only *S. mutans* extract (B). For better detection of the synthetic AcP spot, the labeled acid extract of *S. mutans* UA159 was chromatographed five-fold less (20,000 CPM) than in the Figure 2 and 3. An arrow indicates the location of AcP.

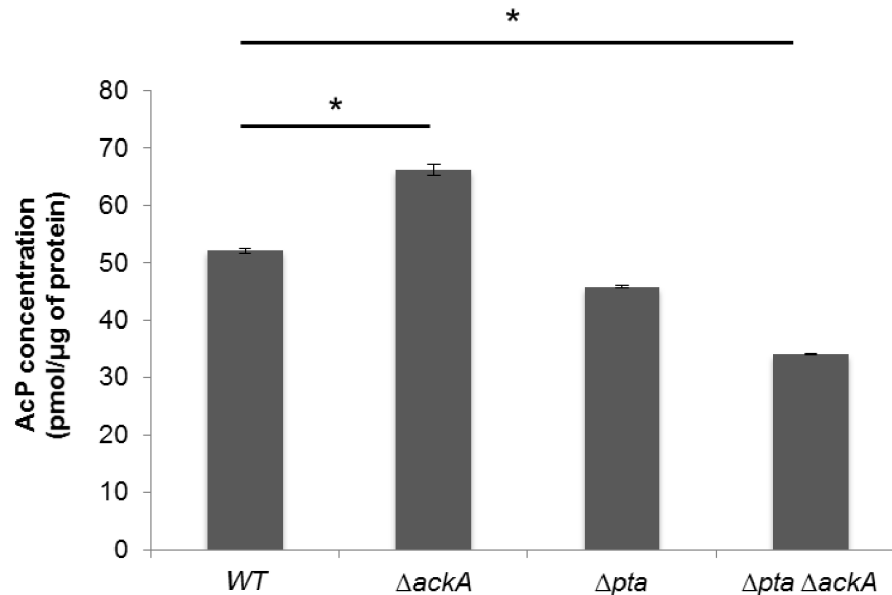

**Figure S2.** Measurement of intracellular AcP concentration. Exponential cells ( $OD_{600} = 0.4$ ) aerobically grown in 5 ml of FMC supplemented with 25 mM glucose were washed twice with 250  $\mu$ l of cold buffer A. Cells were resuspended in 250  $\mu$ l of fresh cold buffer and mechanically disrupted in a Bead Beater-16 cell disrupter (Biospec Products, Inc., Bartlesville, OK) with glass beads (0.1 mm) at 4°C for 30s, twice. After centrifugation at  $10,000 \times g$  at 4°C for 5 min, 200  $\mu$ l of supernatants were mixed with 15 mg of powdered activated charcoal (Sigma) and incubated on ice for 15 min. Aliquots (50  $\mu$ l) of supernatants were used to determine protein concentration. Charcoal was removed by filtration through 13-mm diameter, 0.22- $\mu$ m pore size syringe filter (Millipore). For enzymatic conversion of intracellular AcP to ATP, the filtrated extracts of 100  $\mu$ l were treated with acetate kinase cocktail containing 1 mM  $MgCl_2$ , 30  $\mu$ M ADP, and 4  $\mu$ g purified *E. coli* acetate kinase (Sigma) per ml and incubated at 30°C for 90 min. Triplicate 50  $\mu$ l samples of the cell lysate were each mixed with 50  $\mu$ l of CellTiter-Glo reagent (Promega) in a Costar Cell Culture 96-well flat-bottom plate (Corning, Inc.). The mixtures were incubated at room temperature for 10 min and luminescence was measured using a Synergy™ 2 Multi-Mode Microplate Reader (BioTek® Instruments, Inc., USA). \*, differs from the wild-type genetic background at  $P < 0.01$  (Student's *t*-test).

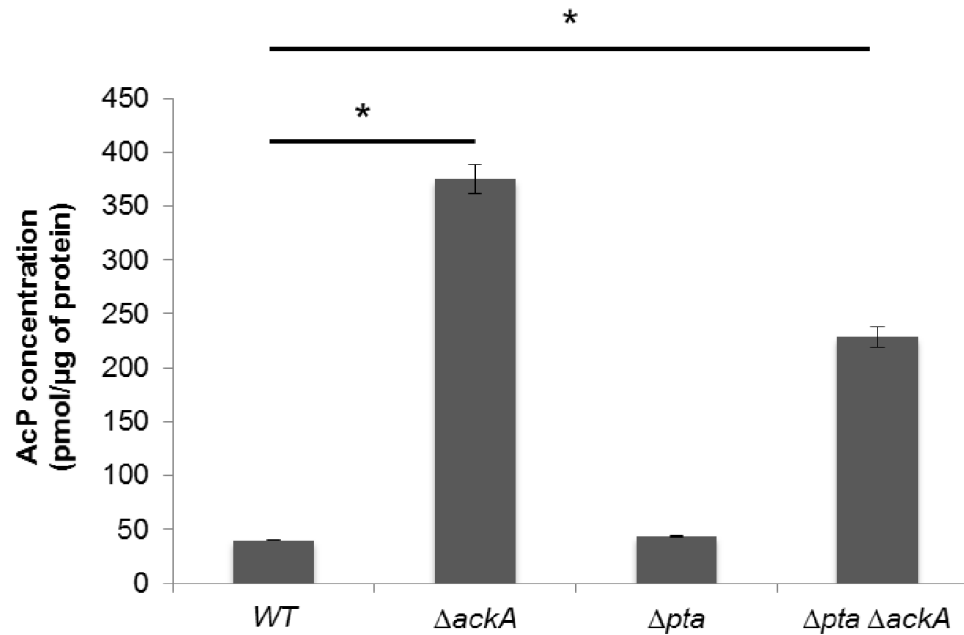

**Figure S3.** Measurement of intracellular AcP concentration. Experimental procedures were described in the legend of Figure S2. Exponential cells ( $OD_{600} = 0.4$ ) aerobically grown in 5 ml of FMC supplemented with 25 mM glucose were subjected to 0.003% hydrogen peroxide for 1 hour. \*, differs from the wild-type genetic background at  $P < 0.01$  (Student's  $t$ -test).

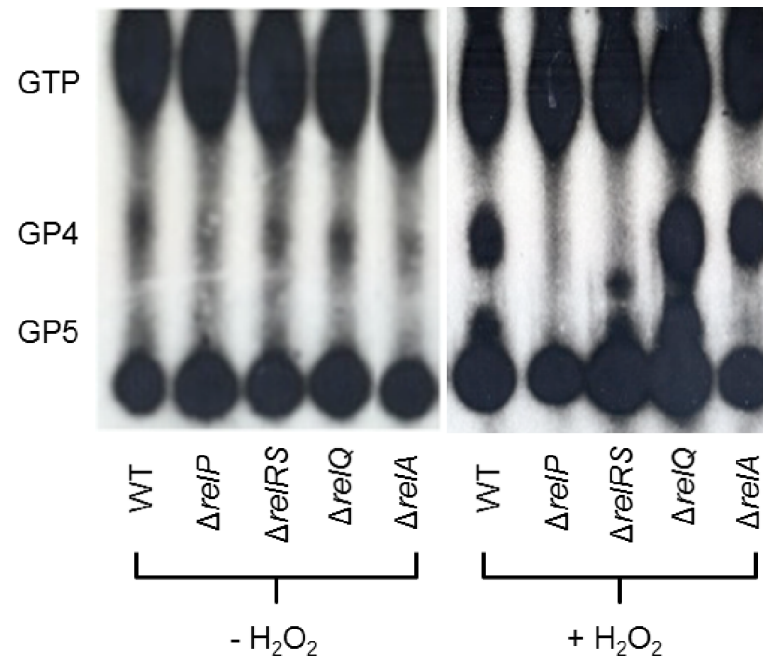

**Figure S4.** Accumulation of (p)ppGpp in *S. mutans* strains with and without 0.003% hydrogen peroxide. (p)ppGpp accumulation of the wild-type strain was compared with that of the  $\Delta relP$ ,  $\Delta relRS$ ,  $\Delta relQ$ , and  $\Delta relA$  mutants. Exponentially grown cells were labeled with [ $^{32}P$ ]-orthophosphate in FMC defined medium and treated with  $H_2O_2$  for 60 min. Nucleotides were extracted by resuspending cells in 10  $\mu$ l of ice cold 13 M formic acid, followed by three freeze-thaw cycles in a dry ice-ethanol bath. The formic acid extracts were spotted onto PEI-cellulose plates for TLC using 1.5 M  $KH_2PO_4$  buffer.

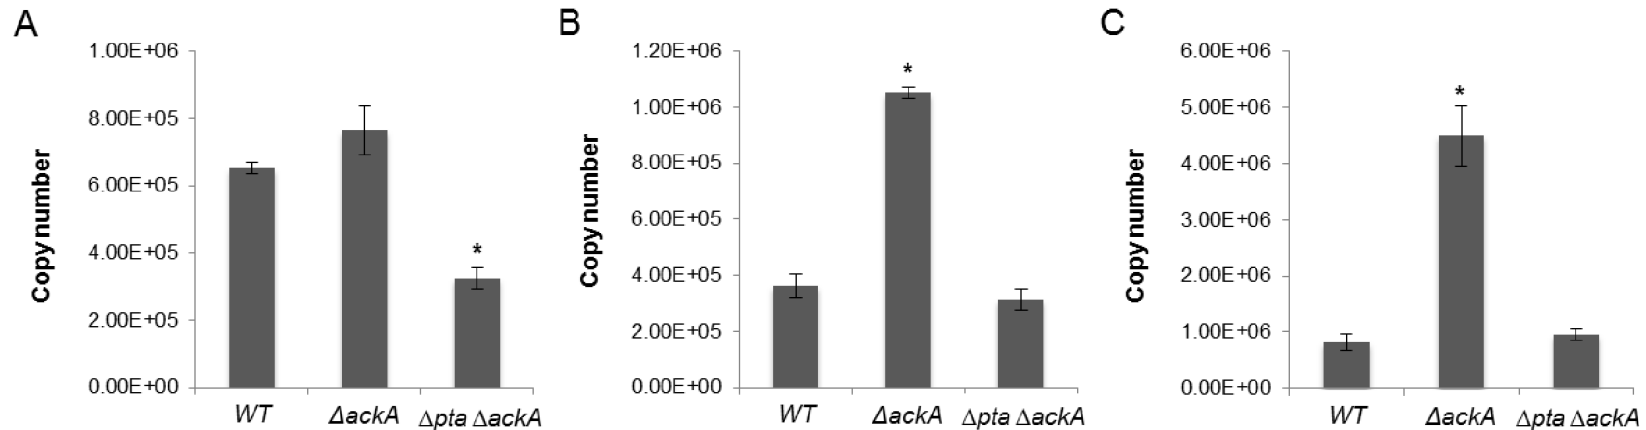

**Figure S5.** Effects of Pta-Ack pathway in expression of three candidate genes from transcriptome analysis. Cells were grown in triplicate to exponential phase ( $OD_{600} = 0.4$ ) in defined FMC medium at 37°C in a 5%  $CO_2$  aerobic atmosphere. The copy number of the *luxS* (A), *spxA* (B), *wapA* (C) transcripts was determined using Real-time qRT-PCR. qRT-PCR data are reported as the copies of the target RNA derived from 1  $\mu g$  of input RNA after normalization to copy number of the 16S rRNA in the same sample. Values shown are the means  $\pm$  standard deviations for RNAs from three separate cultures. \*, differs from the wild-type genetic background at  $P < 0.001$  (Student's *t*-test).

Table S1. Summary of AcP-spot density detected in this study.

| Strain             | AcP-spot density <sup>a</sup>            |                              |                                         |
|--------------------|------------------------------------------|------------------------------|-----------------------------------------|
|                    | Oxygen (Fig. 2A) <sup>b</sup>            | Complementation (Fig. 2B)    | H <sub>2</sub> O <sub>2</sub> (Fig. 3B) |
| WT                 | 86.9 ± 17.9 <sup>c</sup>                 | 52.3 ± 15.5                  | 70.0 ± 11.9                             |
| <i>ΔackA</i>       | 119.7 ± 9.9, <i>P</i> ≤0.05 <sup>d</sup> | 103.2 ± 22.8, <i>P</i> <0.05 | 148.9 ± 20.7, <i>P</i> <0.05            |
| <i>Δpta</i>        | 41.2 ± 11.5, <i>P</i> <0.05              | ND <sup>e</sup>              | 74.6 ± 20.5                             |
| <i>Δpta ΔackA</i>  | 4.6 ± 7.3, <i>P</i> <0.05                | ND                           | 91.6 ± 5.8, <i>P</i> <0.05              |
| <i>Δpta</i> + com  | ND                                       | 48.8 ± 17.9                  | ND                                      |
| <i>ΔackA</i> + com | ND                                       | 43.1 ± 11.2                  | ND                                      |

<sup>a</sup> Sum of pixel in area

<sup>b</sup> Parentheses indicate a figure number, from where the spot density has been calculated

<sup>c</sup> A numerical value that shows the means ± standard deviations of individual spot density

<sup>d</sup> A statistical value, differs from the wild-type genetic background (Student's *t*-test)

<sup>e</sup> ND, not determined

Table S2. Genes differentially expressed by loss of *ackA* gene, compared to the wild-type strain ( $P < 0.005$ ).

| Locus     | Description                                                                                                          | Gene Symbol   | Gene Function                                                                                                                           | Fold change |
|-----------|----------------------------------------------------------------------------------------------------------------------|---------------|-----------------------------------------------------------------------------------------------------------------------------------------|-------------|
| SMU.1365c | permease                                                                                                             |               | Transport and binding proteins; ABC Superfamily: membrane spanning permease                                                             | 2.485       |
| SMU.1941  | putative membrane lipoprotein                                                                                        | <i>atmB</i>   | Transport and binding proteins; ABC Superfamily: substrate-binding protein                                                              | 2.141       |
| SMU.506   | putative type II restriction endonuclease                                                                            |               | DNA metabolism; DNA replication, recombination, and repair                                                                              | 1.916       |
| SMU.987   | cell wall-associated protein precursor WapA                                                                          | <i>wapA</i>   | Unassigned                                                                                                                              | 1.914       |
| SMU.549   | undecaprenyldiphospho-muramoylpentapeptide beta-N-acetylglucosaminyltransferase                                      | <i>murG</i>   | Cell envelope; Biosynthesis and degradation of murein sacculus and peptidoglycan                                                        | 1.901       |
| SMU.557   | putative cell division protein DivIVA                                                                                | <i>divIVA</i> | Cellular processes; Cell division                                                                                                       | 1.879       |
| SMU.21    | putative cell shape-determining protein MreD                                                                         | <i>mreD</i>   | Cell envelope; Biosynthesis and degradation of murein sacculus and peptidoglycan                                                        | 1.856       |
| SMU.1089  | hypothetical protein                                                                                                 |               | Unknown                                                                                                                                 | 1.839       |
| SMU.1206c | hypothetical protein                                                                                                 |               | Unknown                                                                                                                                 | 1.815       |
| SMU.454   | putative cell division protein                                                                                       | <i>ftsL</i>   | Cellular processes; Cell division                                                                                                       | 1.808       |
| SMU.1050  | ribose-phosphate pyrophosphokinase                                                                                   | <i>krpS</i>   | Purines, pyrimidines, nucleosides, and nucleotides; Purine ribonucleotide biosynthesis    Cellular processes; Chaperones                | 1.802       |
| SMU.1732c | hypothetical protein                                                                                                 |               | Unknown                                                                                                                                 | 1.784       |
| SMU.1091  | cell wall protein, WapE                                                                                              | <i>wapE</i>   | Hypothetical                                                                                                                            | 1.755       |
| SMU.1923c | transcriptional regulator NrdR                                                                                       | <i>nrdR</i>   | Unknown                                                                                                                                 | 1.720       |
| SMU.1090  | hypothetical protein                                                                                                 |               | Unknown                                                                                                                                 | 1.720       |
| SMU.712   | phosphoenolpyruvate carboxylase                                                                                      | <i>capP</i>   | Central intermediary metabolism; Other metabolism                                                                                       | 1.710       |
| SMU.701c  | hypothetical protein                                                                                                 |               | Unassigned                                                                                                                              | 1.678       |
| SMU.1706  | hypothetical protein                                                                                                 |               | Unknown                                                                                                                                 | 1.675       |
| SMU.1366c | putative ABC transporter, ATP-binding protein                                                                        |               | Transport and binding proteins; ABC Superfamily: ATP-binding protein                                                                    | 1.661       |
| SMU.2138  | replicative DNA helicase                                                                                             | <i>dnaC</i>   | DNA metabolism; DNA replication, recombination, and repair                                                                              | 1.659       |
| SMU.716   | putative peptidoglycan branched peptide synthesis protein, alanine adding enzyme, beta-lactam resistance factor MurN | <i>murN</i>   | Cell envelope; Biosynthesis and degradation of murein sacculus and peptidoglycan    Cellular processes; Toxin production and resistance | 1.655       |
| SMU.475   | hypothetical protein                                                                                                 |               | Unknown                                                                                                                                 | 1.638       |
| SMU.2104a | 50S ribosomal protein L32                                                                                            | <i>rpmF</i>   | Transport and binding proteins; Amino acids, peptides, and amines                                                                       | 1.637       |
| SMU.864   | putative ABC transporter, permease                                                                                   |               | Transport and binding proteins; ABC Superfamily: membrane                                                                               | 1.607       |

|           |                                                                                         |              |                                                                                                                                                     |       |
|-----------|-----------------------------------------------------------------------------------------|--------------|-----------------------------------------------------------------------------------------------------------------------------------------------------|-------|
|           | component                                                                               |              | spanning permease                                                                                                                                   |       |
| SMU.2084c | transcriptional regulator Spx                                                           | <i>spxA</i>  | Unknown                                                                                                                                             | 1.575 |
| SMU.353   | hypothetical protein                                                                    |              | Biosynthesis of cofactors, prosthetic groups, and carriers; Thiamine                                                                                | 1.562 |
| SMU.917c  | putative 6-pyruvoyl tetrahydropterin synthase                                           |              | Biosynthesis of cofactors, prosthetic groups, and carriers; Other                                                                                   | 1.552 |
| SMU.1209c | hypothetical protein                                                                    |              | Hypothetical                                                                                                                                        | 1.531 |
| SMU.2074  | anaerobic ribonucleoside triphosphate reductase                                         | <i>nrdD</i>  | Purines, pyrimidines, nucleosides, and nucleotides; 2'-Deoxyribonucleotide metabolism                                                               | 1.527 |
| SMU.844   | hypothetical protein                                                                    |              | Unknown                                                                                                                                             | 1.521 |
| SMU.1688  | putative extramembranal protein, DltD protein                                           | <i>dltD</i>  | Cell envelope; Biosynthesis and degradation of murein sacculus and peptidoglycan                                                                    | 1.519 |
| SMU.06    | GTP-dependent nucleic acid-binding protein EngD                                         |              | Unassigned                                                                                                                                          | 1.512 |
| SMU.1302  | putative surface adhesin, AdcA protein homolog, putative Zn-binding lipoprotein         | <i>adcA</i>  | Transport and binding proteins; ABC Superfamily: substrate-binding protein                                                                          | 1.510 |
| SMU.1276c | septation ring formation regulator EzrA                                                 |              | Cellular processes; Cell division                                                                                                                   | 1.502 |
| SMU.697   | translation initiation factor IF-3                                                      | <i>infC</i>  | Protein synthesis; Translation factors                                                                                                              | 1.501 |
| SMU.938   | putative phosphomevalonate kinase                                                       |              | Central intermediary metabolism; Other metabolism                                                                                                   | 1.479 |
| SMU.1060  | signal recognition particle protein subunit, Ffh                                        | <i>ffh</i>   | Cellular processes; Adaptations to atypical conditions                                                                                              | 1.465 |
| SMU.53    | hypothetical protein                                                                    |              | Unknown                                                                                                                                             | 1.462 |
| SMU.337   | hypothetical protein                                                                    |              | Unassigned                                                                                                                                          | 1.455 |
| SMU.1635  | putative UDP-N-acetylglucosamine pyrophosphorylase                                      | <i>glmU</i>  | Central intermediary metabolism; Other metabolism                                                                                                   | 1.452 |
| SMU.1412c | putative ABC transporter, membrane protein subunit and ATP-binding protein              |              | Transport and binding proteins; ABC Superfamily: membrane spanning permease    Transport and binding proteins; ABC Superfamily: ATP-binding protein | 1.410 |
| SMU.2086  | competence damage-inducible protein A                                                   | <i>cinA</i>  | Cellular processes; DNA transformation    DNA metabolism; DNA replication, recombination, and repair                                                | 1.405 |
| SMU.1728  | transcription elongation factor GreA                                                    | <i>greA</i>  | Transcription; Transcription factors                                                                                                                | 1.394 |
| SMU.1083c | hypothetical protein                                                                    |              | Unknown                                                                                                                                             | 1.388 |
| SMU.521   | hypothetical protein                                                                    |              | Unknown                                                                                                                                             | 1.359 |
| SMU.1460  | putative dTDP-4-keto-L-rhamnose reductase                                               | <i>rmIC</i>  | Cell envelope; Biosynthesis and degradation of surface polysaccharides and lipopolysaccharides                                                      | 1.350 |
| SMU.418   | transcription elongation factor NusA                                                    | <i>nusA</i>  | Transcription; Transcription factors                                                                                                                | 1.344 |
| SMU.1063  | putative ABC transporter, ATP-binding protein, proline/glycine betaine transport system | <i>opuAa</i> | Transport and binding proteins; ABC Superfamily: ATP-binding protein                                                                                | 1.341 |
| SMU.1122  | cytidine deaminase                                                                      | <i>cdd</i>   | Purines, pyrimidines, nucleosides, and nucleotides; Nucleotide                                                                                      | 1.320 |



|           |                                                                           |              |                                                                                                        |       |
|-----------|---------------------------------------------------------------------------|--------------|--------------------------------------------------------------------------------------------------------|-------|
|           |                                                                           |              | and nucleoside interconversions                                                                        |       |
| SMU.469   | Holliday junction-specific endonuclease                                   | <i>recU</i>  | DNA metabolism; DNA replication, recombination, and repair                                             | 1.316 |
| SMU.331   | putative transcriptional regulator                                        |              | Transcription; Transcription factors                                                                   | 1.314 |
| SMU.1653  | putative D-3-phosphoglycerate dehydrogenase                               | <i>serA</i>  | Amino acid biosynthesis; Serine family                                                                 | 1.310 |
| SMU.518   | hypothetical protein                                                      |              | Unknown                                                                                                | 1.273 |
| SMU.1660c | DNA replication initiation control protein YabA                           |              | Unknown                                                                                                | 1.269 |
| SMU.1663  | thymidylate kinase                                                        | <i>tmk</i>   | Purines, pyrimidines, nucleosides, and nucleotides; Pyrimidine ribonucleotide biosynthesis             | 1.237 |
| SMU.972   | UDP-N-acetylenolpyruvoylglucosamine reductase                             | <i>murB</i>  | Cell envelope; Biosynthesis and degradation of murein sacculus and peptidoglycan                       | 1.230 |
| SMU.1913c | putative immunity protein, BLpL-like                                      |              | Hypothetical                                                                                           | 1.219 |
| SMU.1312  | aspartate aminotransferase                                                | <i>aspB</i>  | Amino acid biosynthesis; Aspartate family                                                              | 1.212 |
| SMU.1624  | ribosome recycling factor                                                 | <i>frr</i>   | Protein synthesis; Translation factors                                                                 | 1.187 |
| SMU.1838  | preprotein translocase subunit SecA                                       | <i>secA</i>  | Protein fate; Protein and peptide secretion and trafficking                                            | 1.183 |
| SMU.1054  | putative glutamine amidotransferase                                       |              | Purines, pyrimidines, nucleosides, and nucleotides; Purine ribonucleotide biosynthesis                 | 1.165 |
| SMU.1659c | hypothetical protein                                                      |              | Unknown                                                                                                | 1.133 |
| SMU.2165  | putative SpoJ                                                             |              | Cellular processes; Cell division                                                                      | 1.126 |
| SMU.86    | hypothetical protein                                                      |              | Unknown                                                                                                | 0.915 |
| SMU.413   | putative ABC transporter, ATP-binding protein                             |              | Transport and binding proteins; ABC Superfamily: ATP-binding protein                                   | 0.883 |
| SMU.1172c | hypothetical protein                                                      |              | Unknown                                                                                                | 0.874 |
| SMU.234   | threonine dehydratase                                                     | <i>ilvA</i>  | Amino acid biosynthesis; Pyruvate family                                                               | 0.865 |
| SMU.1511c | putative acetyltransferase                                                |              | Unassigned                                                                                             | 0.861 |
| SMU.1429  | putative UDP-N-acetylmuramyl tripeptide synthetase MurC                   | <i>murC2</i> | Cell envelope; Biosynthesis and degradation of murein sacculus and peptidoglycan                       | 0.818 |
| SMU.343   | hypothetical protein                                                      |              | Unknown                                                                                                | 0.817 |
| SMU.1808c | putative integrase fragment                                               |              | DNA metabolism; DNA replication, recombination, and repair                                             | 0.816 |
| SMU.1592  | putative dipeptidase PepQ                                                 | <i>pepQ</i>  | Protein fate; Degradation of proteins, peptides, and glycopeptides                                     | 0.806 |
| SMU.1423  | putative pyruvate dehydrogenase, TPP-dependent E1 component alpha-subunit | <i>pdhA</i>  | Energy metabolism; Fermentation                                                                        | 0.798 |
| SMU.857   | putative uracil permease                                                  |              | Transport and binding proteins; Nucleosides, purines and pyrimidines                                   | 0.795 |
| SMU.872   | putative PTS system, fructose-specific enzyme IIBC component              |              | Transport and binding proteins; Carbohydrates, organic alcohols, and acids    Signal transduction; PTS | 0.795 |
| SMU.16    | putative amino acid permease                                              |              | Transport and binding proteins; Amino acids, peptides, and                                             | 0.794 |

|           |                                                          |             |                                                                                                                                                                                  |       |
|-----------|----------------------------------------------------------|-------------|----------------------------------------------------------------------------------------------------------------------------------------------------------------------------------|-------|
|           |                                                          |             | amines                                                                                                                                                                           |       |
| SMU.441   | putative transcriptional regulator                       |             | Transcription; Transcription factors                                                                                                                                             | 0.780 |
| SMU.764   | alkyl hydroperoxide reductase                            | <i>ahpC</i> | Cellular processes; Detoxification                                                                                                                                               | 0.774 |
| SMU.1621c | hypothetical protein                                     |             | Unknown                                                                                                                                                                          | 0.768 |
| SMU.385   | putative glycoprotein endopeptidase                      |             | Protein fate; Degradation of proteins, peptides, and glycopeptides                                                                                                               | 0.767 |
| SMU.595   | dihydroorotate dehydrogenase 1A                          | <i>pyrD</i> | Purines, pyrimidines, nucleosides, and nucleotides; Pyrimidine ribonucleotide biosynthesis                                                                                       | 0.762 |
| SMU.1611c | putative permease, multi-drug resistance efflux pump     |             | Cellular processes; Detoxification    Transport and binding proteins; Other                                                                                                      | 0.755 |
| SMU.1970c | putative phenylalanyl-tRNA synthetase, beta subunit      |             | Protein synthesis; tRNA aminoacylation                                                                                                                                           | 0.752 |
| SMU.1389  | hypothetical protein                                     | <i>pckA</i> | Energy metabolism; Glycolysis/gluconeogenesis                                                                                                                                    | 0.749 |
| SMU.1789c | hypothetical protein                                     |             | Unknown                                                                                                                                                                          | 0.748 |
| SMU.181   | putative mevalonate kinase                               |             | Biosynthesis of cofactors, prosthetic groups, and carriers; Other                                                                                                                | 0.743 |
| SMU.1267c | hypothetical protein                                     |             | Hypothetical                                                                                                                                                                     | 0.735 |
| SMU.1578  | biotin--protein ligase                                   | <i>birA</i> | Protein fate; Protein modification and repair                                                                                                                                    | 0.729 |
| SMU.1548c | putative histidine kinase                                |             | Signal transduction; Two-component systems                                                                                                                                       | 0.728 |
| SMU.391c  | hypothetical protein                                     |             | Unknown                                                                                                                                                                          | 0.724 |
| SMU.568   | putative amino acid ABC transporter, ATP-binding protein |             | Transport and binding proteins; ABC Superfamily: ATP-binding protein                                                                                                             | 0.722 |
| SMU.387   | putative DNA-binding/iron metalloprotein/AP endonuclease |             | Protein fate; Degradation of proteins, peptides, and glycopeptides                                                                                                               | 0.722 |
| SMU.638   | putative 16S pseudouridylate synthase                    |             | Protein synthesis; tRNA and rRNA base modification                                                                                                                               | 0.719 |
| SMU.2036  | putative peptidase                                       | <i>pepO</i> | Protein fate; Degradation of proteins, peptides, and glycopeptides                                                                                                               | 0.718 |
| SMU.260   | hypothetical protein                                     |             | Unknown                                                                                                                                                                          | 0.714 |
| SMU.634   | S-adenosylmethionine:tRNA ribosyltransferase-isomerase   | <i>queA</i> | Protein synthesis; tRNA and rRNA base modification                                                                                                                               | 0.700 |
| SMU.952   | homocysteine methyltransferase                           | <i>mmuM</i> | Energy metabolism; Amino acids and amines                                                                                                                                        | 0.697 |
| SMU.1073  | formate--tetrahydrofolate ligase                         | <i>fthS</i> | Purines, pyrimidines, nucleosides, and nucleotides; Purine ribonucleotide biosynthesis    Amino acid biosynthesis; Aspartate family    Amino acid biosynthesis; Histidine family | 0.692 |
| SMU.435   | putative N-acetylglucosamine-6-phosphate deacetylase     |             | Energy metabolism; Other                                                                                                                                                         | 0.691 |
| SMU.572   | putative tetrahydrofolate dehydrogenase/cyclohydrolase   | <i>foID</i> | Biosynthesis of cofactors, prosthetic groups, and carriers; Folic acid    Amino acid biosynthesis; Aspartate family                                                              | 0.687 |
| SMU.318   | putative hippurate hydrolase                             |             | Central intermediary metabolism; Other metabolism    Protein synthesis; Degradation of proteins, peptides, and                                                                   | 0.685 |

|           |                                                      |              |                                                                   |       |
|-----------|------------------------------------------------------|--------------|-------------------------------------------------------------------|-------|
|           |                                                      |              | glycopeptides                                                     |       |
| SMU.1646c | hemolysis inducing protein                           |              | Unknown                                                           | 0.683 |
| SMU.2127  | putative succinate semialdehyde dehydrogenase        |              | Central intermediary metabolism; Other metabolism                 | 0.675 |
| SMU.1931  | 16S rRNA methyltransferase GidB                      | <i>gidB</i>  | Cellular processes; Cell division                                 | 0.668 |
| SMU.151   | hypothetical protein                                 |              | Unassigned                                                        | 0.657 |
| SMU.1109c | putative integral membrane protein, permease         |              | Unknown                                                           | 0.650 |
| SMU.349   | dimethyladenosine transferase                        | <i>ksgA</i>  | Cellular processes; Toxin production and resistance               | 0.642 |
| SMU.1573  | S-adenosylmethionine synthetase                      | <i>metK</i>  | Central intermediary metabolism; Other metabolism                 | 0.641 |
| SMU.913   | glutamate dehydrogenase                              |              | Amino acid biosynthesis; Glutamate family                         | 0.638 |
| SMU.1869  | putative thioredoxin                                 | <i>trxA</i>  | Energy metabolism; Electron transport                             | 0.626 |
| SMU.18    | hypothetical protein                                 |              | Hypothetical                                                      | 0.625 |
| SMU.390   | hypothetical protein                                 |              | Hypothetical                                                      | 0.618 |
| SMU.1867c | putative alcohol dehydrogenase                       |              | Energy metabolism; Fermentation                                   | 0.603 |
| SMU.951   | putative amino acid permease                         |              | Transport and binding proteins; Amino acids, peptides, and amines | 0.590 |
| SMU.493   | formate acetyltransferase (pyruvate formate-lyase 2) | <i>pfl2</i>  | Energy metabolism; Fermentation                                   | 0.589 |
| SMU.530c  | hypothetical protein                                 |              | Unknown                                                           | 0.580 |
| SMU.125   | hypothetical protein                                 |              | Unknown                                                           | 0.567 |
| SMU.1399  | hypothetical protein                                 |              | Hypothetical                                                      | 0.560 |
| SMU.925   | hypothetical protein                                 |              | Hypothetical                                                      | 0.557 |
| SMU.1298  | 50S ribosomal protein L31 type B                     | <i>rpmE2</i> | Protein synthesis; Ribosomal proteins: synthesis and modification | 0.553 |
| SMU.1203  | branched-chain amino acid aminotransferase           | <i>ilvE</i>  | Amino acid biosynthesis; Pyruvate family                          | 0.541 |
| SMU.564   | hypothetical protein                                 |              | Unknown                                                           | 0.529 |
| SMU.1702c | putative phosphatase                                 |              | Unassigned                                                        | 0.505 |
| SMU.924   | thiol peroxidase                                     | <i>tpx</i>   | Cellular processes; Adaptations to atypical conditions            | 0.442 |
| SMU.929c  | hypothetical protein                                 |              | Unknown                                                           | 0.430 |
| SMU.1978  | putative acetate kinase                              | <i>ackA</i>  | Energy metabolism; Anaerobic                                      | 0.036 |

Table S3. Genes differentially expressed by loss of both *pta* and *ackA* genes, compared to the wild-type strain ( $P < 0.005$ ).

| Locus     | Description                                                    | Gene Symbol  | Gene Function                                                                                                | Fold-change |
|-----------|----------------------------------------------------------------|--------------|--------------------------------------------------------------------------------------------------------------|-------------|
| SMU.1013c | putative Mg <sup>2+</sup> /citrate transporter                 |              | Transport and binding proteins; Carbohydrates, organic alcohols, and acids                                   | 5.127       |
| SMU.1023  | oxaloacetate decarboxylase                                     | <i>pycB</i>  | Amino acid biosynthesis; Pyruvate family                                                                     | 4.962       |
| SMU.1016  | acetyl-CoA carboxylase biotin carboxyl carrier protein subunit | <i>bcc</i>   | Fatty acid and phospholipid metabolism; Other                                                                | 4.896       |
| SMU.1022  | 2'-(5"-triphosphoribosyl)-3'-dephospho-CoA:apo- citrate lyase  | <i>citX</i>  | Unknown                                                                                                      | 4.723       |
| SMU.1018  | hypothetical protein                                           |              | Hypothetical                                                                                                 | 4.561       |
| SMU.1365c | permease                                                       |              | Transport and binding proteins; ABC Superfamily: membrane spanning permease                                  | 3.989       |
| SMU.1366c | putative ABC transporter, ATP-binding protein                  |              | Transport and binding proteins; ABC Superfamily: ATP-binding protein                                         | 3.522       |
| SMU.1020  | putative citrate lyase CiiB, citryl-CoA lyase, beta subunit    | <i>ciiB</i>  | Energy metabolism; Fermentation    Energy metabolism; TCA cycle                                              | 3.504       |
| SMU.1360c | hypothetical protein                                           |              | Hypothetical                                                                                                 | 3.302       |
| SMU.1012c | putative transcriptional regulator                             |              | Transcription; Transcription factors                                                                         | 2.686       |
| SMU.1342  | putative bacitracin synthetase 1, BacA                         | <i>bacA1</i> | Cellular processes; Toxin production and resistance                                                          | 2.349       |
| SMU.53    | hypothetical protein                                           |              | Unknown                                                                                                      | 2.009       |
| SMU.671   | citrate synthase                                               | <i>citZ</i>  | Energy metabolism; TCA cycle                                                                                 | 1.895       |
| SMU.58    | hypothetical protein                                           |              | Hypothetical                                                                                                 | 1.863       |
| SMU.2005  | adenylate kinase                                               | <i>adk</i>   | Purines, pyrimidines, nucleosides, and nucleotides; Nucleotide and nucleoside interconversions               | 1.687       |
| SMU.131   | putative lipoate-protein ligase                                | <i>lplA</i>  | Protein fate; Protein modification and repair                                                                | 1.656       |
| SMU.129   | branched-chain alpha-keto acid dehydrogenase subunit E2        | <i>adhC</i>  | Energy metabolism; Glycolysis/gluconeogenesis                                                                | 1.631       |
| SMU.52    | hypothetical protein                                           |              | Unknown                                                                                                      | 1.604       |
| SMU.287   | putative ComB, accessory factor for ComA                       |              | Transport and binding proteins; ABC Superfamily: substrate-binding protein    Cellular processes; Competence | 1.505       |
| SMU.1081c | hypothetical protein                                           |              | Unknown                                                                                                      | 1.436       |
| SMU.1910c | hypothetical protein                                           |              | Hypothetical                                                                                                 | 1.426       |
| SMU.521   | hypothetical protein                                           |              | Unknown                                                                                                      | 1.391       |
| SMU.2033c | hypothetical protein                                           |              | Unknown                                                                                                      | 1.362       |
| SMU.419   | hypothetical protein                                           |              | Unknown                                                                                                      | 1.353       |
| SMU.1392c | putative acetyltransferase                                     |              | Unknown                                                                                                      | 1.328       |

|           |                                                                                         |              |                                                                                            |       |
|-----------|-----------------------------------------------------------------------------------------|--------------|--------------------------------------------------------------------------------------------|-------|
| SMU.915c  | 7-cyano-7-deazaguanine reductase                                                        |              | Unknown                                                                                    | 1.319 |
| SMU.782   | hypothetical protein                                                                    |              | Unknown                                                                                    | 1.309 |
| SMU.1096  | putative ABC transporter, ATP-binding protein, choline transporter                      | <i>opuBa</i> | Transport and binding proteins; ABC Superfamily: ATP-binding protein                       | 1.307 |
| SMU.365   | glutamate synthase (large subunit)                                                      | <i>gltA</i>  | Amino acid biosynthesis; Glutamate family                                                  | 1.297 |
| SMU.1063  | putative ABC transporter, ATP-binding protein, proline/glycine betaine transport system | <i>opuAa</i> | Transport and binding proteins; ABC Superfamily: ATP-binding protein                       | 1.249 |
| SMU.691   | peptidase T                                                                             | <i>pepT</i>  | Protein fate; Degradation of proteins, peptides, and glycopeptides                         | 1.226 |
| SMU.2142  | hypothetical protein                                                                    | <i>rpiB</i>  | Energy metabolism; Pentose phosphate pathway                                               | 1.218 |
| SMU.109   | permease (efflux protein)                                                               |              | Transport and binding proteins; Other                                                      | 1.186 |
| SMU.982   | putative BglB fragment                                                                  | <i>bglB2</i> | Energy metabolism; Sugars                                                                  | 1.097 |
| SMU.1850  | putative aminopeptidase P                                                               | <i>pepP</i>  | Protein fate; Degradation of proteins, peptides, and glycopeptides                         | 1.077 |
| SMU.1936c | hypothetical protein                                                                    |              | Unknown                                                                                    | 0.868 |
| SMU.613   | hypothetical protein                                                                    |              | Hypothetical                                                                               | 0.868 |
| SMU.73    | hypothetical protein                                                                    |              | Unknown                                                                                    | 0.857 |
| SMU.1612c | hypothetical protein                                                                    |              | Unknown                                                                                    | 0.852 |
| SMU.841   | putative aminotransferase                                                               |              | Biosynthesis of cofactors, prosthetic groups, and carriers; Other                          | 0.844 |
| SMU.1802c | hypothetical protein                                                                    |              | Unknown                                                                                    | 0.831 |
| SMU.413   | putative ABC transporter, ATP-binding protein                                           |              | Transport and binding proteins; ABC Superfamily: ATP-binding protein                       | 0.828 |
| SMU.1957  | putative PTS system, mannose-specific IID component                                     |              | Signal transduction; PTS                                                                   | 0.820 |
| SMU.1292c | hypothetical protein                                                                    |              | Unknown                                                                                    | 0.810 |
| SMU.973   | putative spermidine/putrescine ABC transporter, ATP-binding protein                     | <i>potA</i>  | Transport and binding proteins; ABC Superfamily: ATP-binding protein                       | 0.800 |
| SMU.1655c | hypothetical protein                                                                    |              | Hypothetical                                                                               | 0.800 |
| SMU.996   | ferrichrome ABC transporter permease protein                                            |              | Transport and binding proteins; ABC Superfamily: membrane spanning permease                | 0.799 |
| SMU.761   | putative protease                                                                       |              | Unassigned                                                                                 | 0.796 |
| SMU.1621c | hypothetical protein                                                                    |              | Unknown                                                                                    | 0.779 |
| SMU.1223  | dihydroorotate dehydrogenase 1B                                                         | <i>pyrDB</i> | Purines, pyrimidines, nucleosides, and nucleotides; Pyrimidine ribonucleotide biosynthesis | 0.772 |
| SMU.67    | putative acyltransferase                                                                |              | Unassigned                                                                                 | 0.765 |

|           |                                                               |             |                                                                                                                                                                                        |       |
|-----------|---------------------------------------------------------------|-------------|----------------------------------------------------------------------------------------------------------------------------------------------------------------------------------------|-------|
| SMU.1467  | adenine phosphoribosyltransferase                             | <i>apt</i>  | Purines, pyrimidines, nucleosides, and nucleotides; Salvage of nucleosides and nucleotides                                                                                             | 0.762 |
| SMU.1676c | hypothetical protein                                          |             | Transport and binding proteins; Carbohydrates, organic alcohols, and acids                                                                                                             | 0.757 |
| SMU.942   | putative hydroxymethylglutaryl-CoA reductase                  | <i>mvaA</i> | Energy metabolism; Other                                                                                                                                                               | 0.745 |
| SMU.2126c | putative purine-nucleoside phosphorylase                      |             | Purines, pyrimidines, nucleosides, and nucleotides; Salvage of nucleosides and nucleotides                                                                                             | 0.738 |
| SMU.1288  | 50S ribosomal protein L19                                     | <i>rplS</i> | Protein synthesis; Ribosomal proteins: synthesis and modification                                                                                                                      | 0.736 |
| SMU.1446c | putative ABC transporter, permease protein                    |             | Transport and binding proteins; ABC Superfamily: membrane spanning permease                                                                                                            | 0.734 |
| SMU.880   | multiple sugar-binding ABC transporter, permease protein MsmG | <i>msmG</i> | Transport and binding proteins; Carbohydrates, organic alcohols, and acids    Energy metabolism; Sugars    Transport and binding proteins; ABC Superfamily: membrane spanning permease | 0.715 |
| SMU.725c  | hypothetical protein                                          |             | Unknown                                                                                                                                                                                | 0.713 |
| SMU.929c  | hypothetical protein                                          |             | Unknown                                                                                                                                                                                | 0.711 |
| SMU.857   | putative uracil permease                                      |             | Transport and binding proteins; Nucleosides, purines and pyrimidines                                                                                                                   | 0.705 |
| SMU.1119c | putative sugar ABC transporter, permease protein              |             | Transport and binding proteins; ABC Superfamily: membrane spanning permease                                                                                                            | 0.704 |
| SMU.133c  | putative MDR permease, transmembrane efflux protein           |             | Transport and binding proteins; Carbohydrates, organic alcohols, and acids                                                                                                             | 0.701 |
| SMU.1593c | putative CDP-diglyceride synthetase                           |             | Unknown                                                                                                                                                                                | 0.696 |
| SMU.838   | glutathione reductase                                         | <i>gshR</i> | Biosynthesis of cofactors, prosthetic groups, and carriers; Glutathione and analogs    Cellular processes; Detoxification                                                              | 0.686 |
| SMU.1324  | putative cell-division protein FtsX                           | <i>ftsX</i> | Cellular processes; Cell division    Transport and binding proteins; ABC Superfamily: membrane spanning permease                                                                       | 0.681 |
| SMU.1389  | hypothetical protein                                          | <i>pckA</i> | Energy metabolism; Glycolysis/gluconeogenesis                                                                                                                                          | 0.678 |
| SMU.1950  | putative pseudouridylate synthase                             |             | Protein synthesis; tRNA and rRNA base modification                                                                                                                                     | 0.673 |
| SMU.1587c | hypothetical protein                                          |             | Hypothetical                                                                                                                                                                           | 0.668 |
| SMU.387   | putative DNA-binding/iron metalloprotein/AP endonuclease      |             | Protein fate; Degradation of proteins, peptides, and glycopeptides                                                                                                                     | 0.664 |
| SMU.1203  | branched-chain amino acid aminotransferase                    | <i>ilvE</i> | Amino acid biosynthesis; Pyruvate family                                                                                                                                               | 0.660 |
| SMU.2146c | hypothetical protein                                          |             | Unknown                                                                                                                                                                                | 0.657 |
| SMU.1570  | putative maltose/maltodextrin ABC transporter, MalG permease  | <i>malG</i> | Transport and binding proteins; ABC Superfamily: membrane spanning permease                                                                                                            | 0.657 |
| SMU.1958c | putative PTS system, mannose-                                 |             | Signal transduction; PTS                                                                                                                                                               | 0.656 |

|           |                                                                                  |             |                                                                                                                                      |       |
|-----------|----------------------------------------------------------------------------------|-------------|--------------------------------------------------------------------------------------------------------------------------------------|-------|
|           | specific IIC component                                                           |             |                                                                                                                                      |       |
| SMU.621c  | hypothetical protein                                                             |             | Unknown                                                                                                                              | 0.653 |
| SMU.119   | putative alcohol dehydrogenase class III                                         | <i>adh</i>  | Energy metabolism; Fermentation                                                                                                      | 0.653 |
| SMU.1109c | putative integral membrane protein, permease                                     |             | Unknown                                                                                                                              | 0.651 |
| SMU.2056  | recombination factor protein RarA                                                |             | Cellular processes; Cell division                                                                                                    | 0.647 |
| SMU.1323  | hydrolase                                                                        |             | Unknown                                                                                                                              | 0.645 |
| SMU.523   | hypothetical protein                                                             |             | Unknown                                                                                                                              | 0.644 |
| SMU.1722c | putative integral membrane protein                                               |             | Unknown                                                                                                                              | 0.644 |
| SMU.1266  | imidazole glycerol phosphate synthase subunit HisH                               | <i>hisH</i> | Amino acid biosynthesis; Histidine family                                                                                            | 0.639 |
| SMU.636   | putative N-acetylglucosamine-6-phosphate isomerase                               |             | Central intermediary metabolism; Amino sugars                                                                                        | 0.632 |
| SMU.570   | putative ferrous ion transport protein B                                         | <i>feoB</i> | Transport and binding proteins; Cations and iron carrying compounds                                                                  | 0.631 |
| SMU.856   | bifunctional pyrimidine regulatory protein PyrR uracil phosphoribosyltransferase | <i>pyrR</i> | Regulatory functions; DNA interactions    Purines, pyrimidines, nucleosides, and nucleotides; Pyrimidine ribonucleotide biosynthesis | 0.623 |
| SMU.2055  | putative acetyltransferase                                                       |             | Unassigned                                                                                                                           | 0.622 |
| SMU.1828  | hypothetical protein                                                             |             | Unknown                                                                                                                              | 0.617 |
| SMU.2075c | hypothetical protein                                                             |             | Unknown                                                                                                                              | 0.606 |
| SMU.771c  | hypothetical protein                                                             |             | Hypothetical                                                                                                                         | 0.604 |
| SMU.1902c | hypothetical protein                                                             |             | Hypothetical                                                                                                                         | 0.603 |
| SMU.474   | S-ribosylhomocysteinase                                                          | <i>luxS</i> | Cellular processes; Other                                                                                                            | 0.601 |
| SMU.321   | hypothetical protein                                                             |             | Unknown                                                                                                                              | 0.600 |
| SMU.495   | glycerol dehydrogenase                                                           | <i>gldA</i> | Energy metabolism; Sugars                                                                                                            | 0.599 |
| SMU.1807c | putative integral membrane protein, permease                                     |             | Unassigned                                                                                                                           | 0.592 |
| SMU.388   | putative integral membrane protein, branched-chain amino acid permease           |             | Transport and binding proteins; Amino acids, peptides, and amines                                                                    | 0.592 |
| SMU.291   | transketolase                                                                    | <i>tkt</i>  | Energy metabolism; Pentose phosphate pathway                                                                                         | 0.587 |
| SMU.1399  | hypothetical protein                                                             |             | Hypothetical                                                                                                                         | 0.582 |
| SMU.911c  | hypothetical protein                                                             |             | Hypothetical                                                                                                                         | 0.582 |
| SMU.1115  | L-lactate dehydrogenase                                                          | <i>ldh</i>  | Energy metabolism; Glycolysis/gluconeogenesis                                                                                        | 0.580 |

|           |                                                      |             |                                                            |       |
|-----------|------------------------------------------------------|-------------|------------------------------------------------------------|-------|
| SMU.1649  | putative exodeoxyribonuclease III                    | <i>exoA</i> | DNA metabolism; DNA replication, recombination, and repair | 0.572 |
| SMU.303   | hypothetical protein                                 |             | Unknown                                                    | 0.561 |
| SMU.564   | hypothetical protein                                 |             | Unknown                                                    | 0.544 |
| SMU.1450  | putative amino acid permease                         |             | Unassigned                                                 | 0.491 |
| SMU.1545c | hypothetical protein                                 |             | Unknown                                                    | 0.474 |
| SMU.493   | formate acetyltransferase (pyruvate formate-lyase 2) | <i>pfl2</i> | Energy metabolism; Fermentation                            | 0.454 |
| SMU.1043c | phosphotransacetylase                                | <i>pta</i>  | Energy metabolism; Fermentation                            | 0.243 |
| SMU.1978  | putative acetate kinase                              | <i>ackA</i> | Energy metabolism; Anaerobic                               | 0.040 |



Table S4. Genes differentially expressed by loss of *ackA* versus both *pta* and *ackA* genes ( $P < 0.005$ ).

| Locus     | Description                                                                | Gene symbol | Gene Function                                                                                                                                                                          | Fold-change |
|-----------|----------------------------------------------------------------------------|-------------|----------------------------------------------------------------------------------------------------------------------------------------------------------------------------------------|-------------|
| SMU.1043c | phosphotransacetylase                                                      | <i>pta</i>  | Energy metabolism; Fermentation                                                                                                                                                        | 4.88        |
| SMU.1419  | putative transcriptional regulator                                         |             | Transcription; Transcription factors                                                                                                                                                   | 2.23        |
| SMU.935   | putative amino acid ABC transporter, permease protein                      |             | Transport and binding proteins; ABC Superfamily: membrane spanning permease                                                                                                            | 2.21        |
| SMU.81    | heat shock protein GrpE (HSP-70 cofactor)                                  | <i>grpE</i> | Protein fate; Protein folding and stabilization                                                                                                                                        | 2.18        |
| SMU.80    | heat-inducible transcription repressor                                     | <i>hrcA</i> | Regulatory functions; DNA interactions                                                                                                                                                 | 2.15        |
| SMU.1941  | putative membrane lipoprotein                                              | <i>atmB</i> | Transport and binding proteins; ABC Superfamily: substrate-binding protein                                                                                                             | 1.99        |
| SMU.932   | hypothetical protein                                                       |             | Unknown                                                                                                                                                                                | 1.94        |
| SMU.496   | putative cysteine synthetase A, O-acetylserine lyase                       | <i>cysK</i> | Amino acid biosynthesis; Serine family                                                                                                                                                 | 1.91        |
| SMU.880   | multiple sugar-binding ABC transporter, permease protein MsmG              | <i>msmG</i> | Transport and binding proteins; Carbohydrates, organic alcohols, and acids    Energy metabolism; Sugars    Transport and binding proteins; ABC Superfamily: membrane spanning permease | 1.9         |
| SMU.01    | chromosomal replication initiation protein                                 | <i>dnaA</i> | DNA metabolism; DNA replication, recombination, and repair                                                                                                                             | 1.89        |
| SMU.987   | cell wall-associated protein precursor WapA                                | <i>wapA</i> | Unassigned                                                                                                                                                                             | 1.85        |
| SMU.1412c | putative ABC transporter, membrane protein subunit and ATP-binding protein |             | Transport and binding proteins; ABC Superfamily: membrane spanning permease    Transport and binding proteins; ABC Superfamily: ATP-binding protein                                    | 1.77        |
| SMU.459   | putative ABC transporter, amino acid binding protein                       |             | Transport and binding proteins; ABC Superfamily: substrate-binding protein                                                                                                             | 1.76        |
| SMU.1206c | hypothetical protein                                                       |             | Unknown                                                                                                                                                                                | 1.67        |
| SMU.2084c | transcriptional regulator Spx                                              | <i>spxA</i> | Unknown                                                                                                                                                                                | 1.62        |
| SMU.1050  | ribose-phosphate pyrophosphokinase                                         | <i>krpS</i> | Purines, pyrimidines, nucleosides, and nucleotides; Purine ribonucleotide biosynthesis    Cellular processes; Chaperones                                                               | 1.6         |
| SMU.864   | putative ABC transporter, permease component                               |             | Transport and binding proteins; ABC Superfamily: membrane spanning permease                                                                                                            | 1.6         |
| SMU.1938c | putative ABC transporter, permease protein                                 |             | Transport and binding proteins; ABC Superfamily: membrane spanning permease                                                                                                            | 1.6         |
| SMU.1659c | hypothetical protein                                                       |             | Unknown                                                                                                                                                                                | 1.59        |

|           |                                                              |             |                                                                                                                        |      |
|-----------|--------------------------------------------------------------|-------------|------------------------------------------------------------------------------------------------------------------------|------|
| SMU.1727  | OxaA-like protein precursor                                  |             | Cell envelope; Other                                                                                                   | 1.57 |
| SMU.353   | hypothetical protein                                         |             | Biosynthesis of cofactors, prosthetic groups, and carriers; Thiamine                                                   | 1.51 |
| SMU.712   | phosphoenolpyruvate carboxylase                              | <i>capP</i> | Central intermediary metabolism; Other metabolism                                                                      | 1.5  |
| SMU.1958c | putative PTS system, mannose-specific IIC component          |             | Signal transduction; PTS                                                                                               | 1.47 |
| SMU.244   | undecaprenyl pyrophosphate phosphatase                       | <i>uppP</i> | Cellular processes; Detoxification    Cell envelope; Biosynthesis and degradation of murein sacculus and peptidoglycan | 1.44 |
| SMU.2086  | competence damage-inducible protein A                        | <i>cinA</i> | Cellular processes; DNA transformation    DNA metabolism; DNA replication, recombination, and repair                   | 1.42 |
| SMU.551   | cell division protein FtsA                                   | <i>ftsA</i> | Cellular processes; Cell division                                                                                      | 1.42 |
| SMU.1457  | putative dTDP-glucose-4,6-dehydratase                        | <i>rmlB</i> | Cell envelope; Surface polysaccharides, lipopolysaccharides and antigens                                               | 1.41 |
| SMU.1570  | putative maltose/maltodextrin ABC transporter, MalG permease | <i>malG</i> | Transport and binding proteins; ABC Superfamily: membrane spanning permease                                            | 1.4  |
| SMU.586   | hypothetical protein                                         |             | Unknown                                                                                                                | 1.39 |
| SMU.1324  | putative cell-division protein FtsX                          | <i>ftsX</i> | Cellular processes; Cell division    Transport and binding proteins; ABC Superfamily: membrane spanning permease       | 1.39 |
| SMU.1204  | DNA topoisomerase IV subunit A                               | <i>parC</i> | DNA metabolism; DNA replication, recombination, and repair                                                             | 1.39 |
| SMU.1195  | permease                                                     |             | Transport and binding proteins; ABC Superfamily: membrane spanning permease                                            | 1.35 |
| SMU.1957  | putative PTS system, mannose-specific IID component          |             | Signal transduction; PTS                                                                                               | 1.33 |
| SMU.1663  | thymidylate kinase                                           | <i>tmk</i>  | Purines, pyrimidines, nucleosides, and nucleotides; Pyrimidine ribonucleotide biosynthesis                             | 1.32 |
| SMU.1936c | hypothetical protein                                         |             | Unknown                                                                                                                | 1.31 |
| SMU.1935c | hypothetical protein                                         |             | Unknown                                                                                                                | 1.31 |
| SMU.469   | Holliday junction-specific endonuclease                      | <i>recU</i> | DNA metabolism; DNA replication, recombination, and repair                                                             | 1.29 |
| SMU.1460  | putative dTDP-4-keto-L-rhamnose reductase                    | <i>rmlC</i> | Cell envelope; Biosynthesis and degradation of surface polysaccharides and lipopolysaccharides                         | 1.26 |
| SMU.1653  | putative D-3-phosphoglycerate dehydrogenase                  | <i>serA</i> | Amino acid biosynthesis; Serine family                                                                                 | 1.26 |
| SMU.1655c | hypothetical protein                                         |             | Hypothetical                                                                                                           | 1.25 |
| SMU.858   | aspartate carbamoyltransferase catalytic subunit             | <i>pyrB</i> | Purines, pyrimidines, nucleosides, and nucleotides; Pyrimidine ribonucleotide biosynthesis                             | 1.25 |
| SMU.1054  | putative glutamine amidotransferase                          |             | Purines, pyrimidines, nucleosides, and nucleotides; Purine                                                             | 1.25 |

|           |                                                                           |             |                                                                                                                                                                                  |      |
|-----------|---------------------------------------------------------------------------|-------------|----------------------------------------------------------------------------------------------------------------------------------------------------------------------------------|------|
|           |                                                                           |             | ribonucleotide biosynthesis                                                                                                                                                      |      |
| SMU.2074  | anaerobic ribonucleoside triphosphate reductase                           | <i>nrdD</i> | Purines, pyrimidines, nucleosides, and nucleotides; 2'-Deoxyribonucleotide metabolism                                                                                            | 1.25 |
| SMU.1801c | GTP-binding protein YqeH                                                  | <i>yqeH</i> | Unknown                                                                                                                                                                          | 1.21 |
| SMU.841   | putative aminotransferase                                                 |             | Biosynthesis of cofactors, prosthetic groups, and carriers; Other                                                                                                                | 1.19 |
| SMU.972   | UDP-N-acetylenolpyruvoylglucosamine reductase                             | <i>murB</i> | Cell envelope; Biosynthesis and degradation of murein sacculus and peptidoglycan                                                                                                 | 1.16 |
| SMU.328   | putative carbonic anhydrase                                               |             | Unknown                                                                                                                                                                          | 0.87 |
| SMU.1573  | S-adenosylmethionine synthetase                                           | <i>metK</i> | Central intermediary metabolism; Other metabolism                                                                                                                                | 0.75 |
| SMU.53    | hypothetical protein                                                      |             | Unknown                                                                                                                                                                          | 0.73 |
| SMU.59    | adenylosuccinate lyase                                                    | <i>purB</i> | Purines, pyrimidines, nucleosides, and nucleotides; Purine ribonucleotide biosynthesis                                                                                           | 0.73 |
| SMU.764   | alkyl hydroperoxide reductase                                             | <i>ahpC</i> | Cellular processes; Detoxification                                                                                                                                               | 0.72 |
| SMU.952   | homocysteine methyltransferase                                            | <i>mmuM</i> | Energy metabolism; Amino acids and amines                                                                                                                                        | 0.72 |
| SMU.349   | dimethyladenosine transferase                                             | <i>ksgA</i> | Cellular processes; Toxin production and resistance                                                                                                                              | 0.71 |
| SMU.1808c | putative integrase fragment                                               |             | DNA metabolism; DNA replication, recombination, and repair                                                                                                                       | 0.7  |
| SMU.530c  | hypothetical protein                                                      |             | Unknown                                                                                                                                                                          | 0.67 |
| SMU.1702c | putative phosphatase                                                      |             | Unassigned                                                                                                                                                                       | 0.65 |
| SMU.125   | hypothetical protein                                                      |             | Unknown                                                                                                                                                                          | 0.64 |
| SMU.365   | glutamate synthase (large subunit)                                        | <i>gltA</i> | Amino acid biosynthesis; Glutamate family                                                                                                                                        | 0.64 |
| SMU.367   | hypothetical protein                                                      |             | Unassigned                                                                                                                                                                       | 0.64 |
| SMU.1073  | formate--tetrahydrofolate ligase                                          | <i>fthS</i> | Purines, pyrimidines, nucleosides, and nucleotides; Purine ribonucleotide biosynthesis    Amino acid biosynthesis; Aspartate family    Amino acid biosynthesis; Histidine family | 0.63 |
| SMU.925   | hypothetical protein                                                      |             | Hypothetical                                                                                                                                                                     | 0.61 |
| SMU.36    | hypothetical protein                                                      |             | Unknown                                                                                                                                                                          | 0.61 |
| SMU.128   | putative acetoin dehydrogenase (TPP-dependent), E1 component beta subunit | <i>adhB</i> | Energy metabolism; Fermentation                                                                                                                                                  | 0.57 |
| SMU.924   | thiol peroxidase                                                          | <i>tpx</i>  | Cellular processes; Adaptations to atypical conditions                                                                                                                           | 0.52 |
| SMU.671   | citrate synthase                                                          | <i>citZ</i> | Energy metabolism; TCA cycle                                                                                                                                                     | 0.47 |
| SMU.1366c | putative ABC transporter, ATP-binding protein                             |             | Transport and binding proteins; ABC Superfamily: ATP-binding protein                                                                                                             | 0.47 |

|           |                                                                |             |                                                                            |      |
|-----------|----------------------------------------------------------------|-------------|----------------------------------------------------------------------------|------|
| SMU.129   | branched-chain alpha-keto acid dehydrogenase subunit E2        | <i>adhC</i> | Energy metabolism; Glycolysis/gluconeogenesis                              | 0.46 |
| SMU.1012c | putative transcriptional regulator                             |             | Transcription; Transcription factors                                       | 0.42 |
| SMU.1017  | putative oxaloacetate decarboxylase, sodium ion pump subunit   | <i>oadB</i> | Amino acid biosynthesis; Pyruvate family                                   | 0.37 |
| SMU.1360c | hypothetical protein                                           |             | Hypothetical                                                               | 0.35 |
| SMU.1020  | putative citrate lyase CiiB, citryl-CoA lyase, beta subunit    | <i>cilB</i> | Energy metabolism; Fermentation    Energy metabolism; TCA cycle            | 0.29 |
| SMU.1018  | hypothetical protein                                           |             | Hypothetical                                                               | 0.24 |
| SMU.1023  | oxaloacetate decarboxylase                                     | <i>pycB</i> | Amino acid biosynthesis; Pyruvate family                                   | 0.23 |
| SMU.1022  | 2'-(5"-triphosphoribosyl)-3'-dephospho-CoA:apo- citrate lyase  | <i>citX</i> | Unknown                                                                    | 0.21 |
| SMU.1013c | putative Mg2+/citrate transporter                              |             | Transport and binding proteins; Carbohydrates, organic alcohols, and acids | 0.21 |
| SMU.1016  | acetyl-CoA carboxylase biotin carboxyl carrier protein subunit | <i>bcc</i>  | Fatty acid and phospholipid metabolism; Other                              | 0.15 |
